# Supplementary material for: Screening and evolution of a novel protist xylose isomerase from the termite Reticulitermes speratus for efficient xylose fermentation in Saccharomyces cerevisiae
Source: PubMed Central journal article supplement (PMC5569483; doi:10.1186/s13068-017-0890-1), 2017-08-23

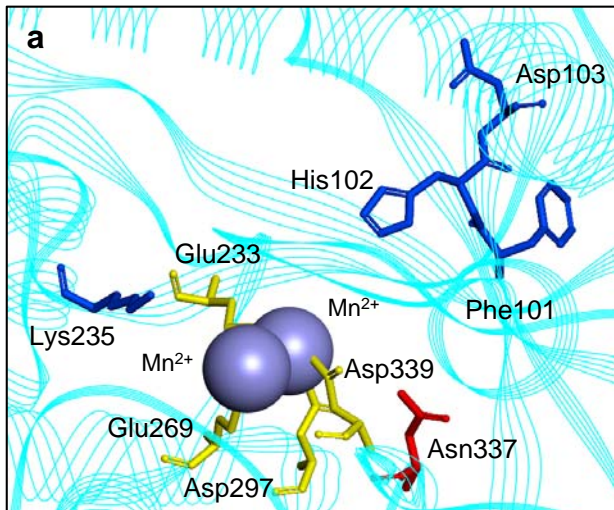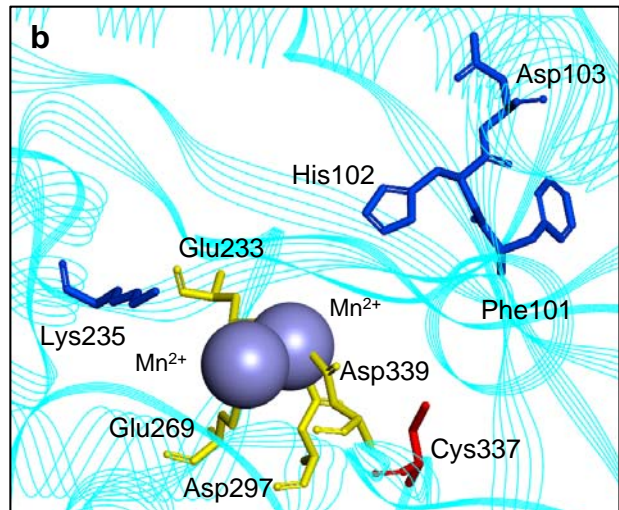

Supplement: 13068_2017_890_MOESM9_ESM.pdf [file 13068_2017_890_MOESM9_ESM.pdf]
